# Supplementary material for: Systemic immune dysregulation and neutrophil activation define prognostic inflammatory signatures in drug-resistant epilepsy
Source: JCI journal article supplement (doi:10.1172/jci.insight.200419), 2026-04-14
Supplement: sd1 [file 1]

**Selection of neutrophils by size and granularity**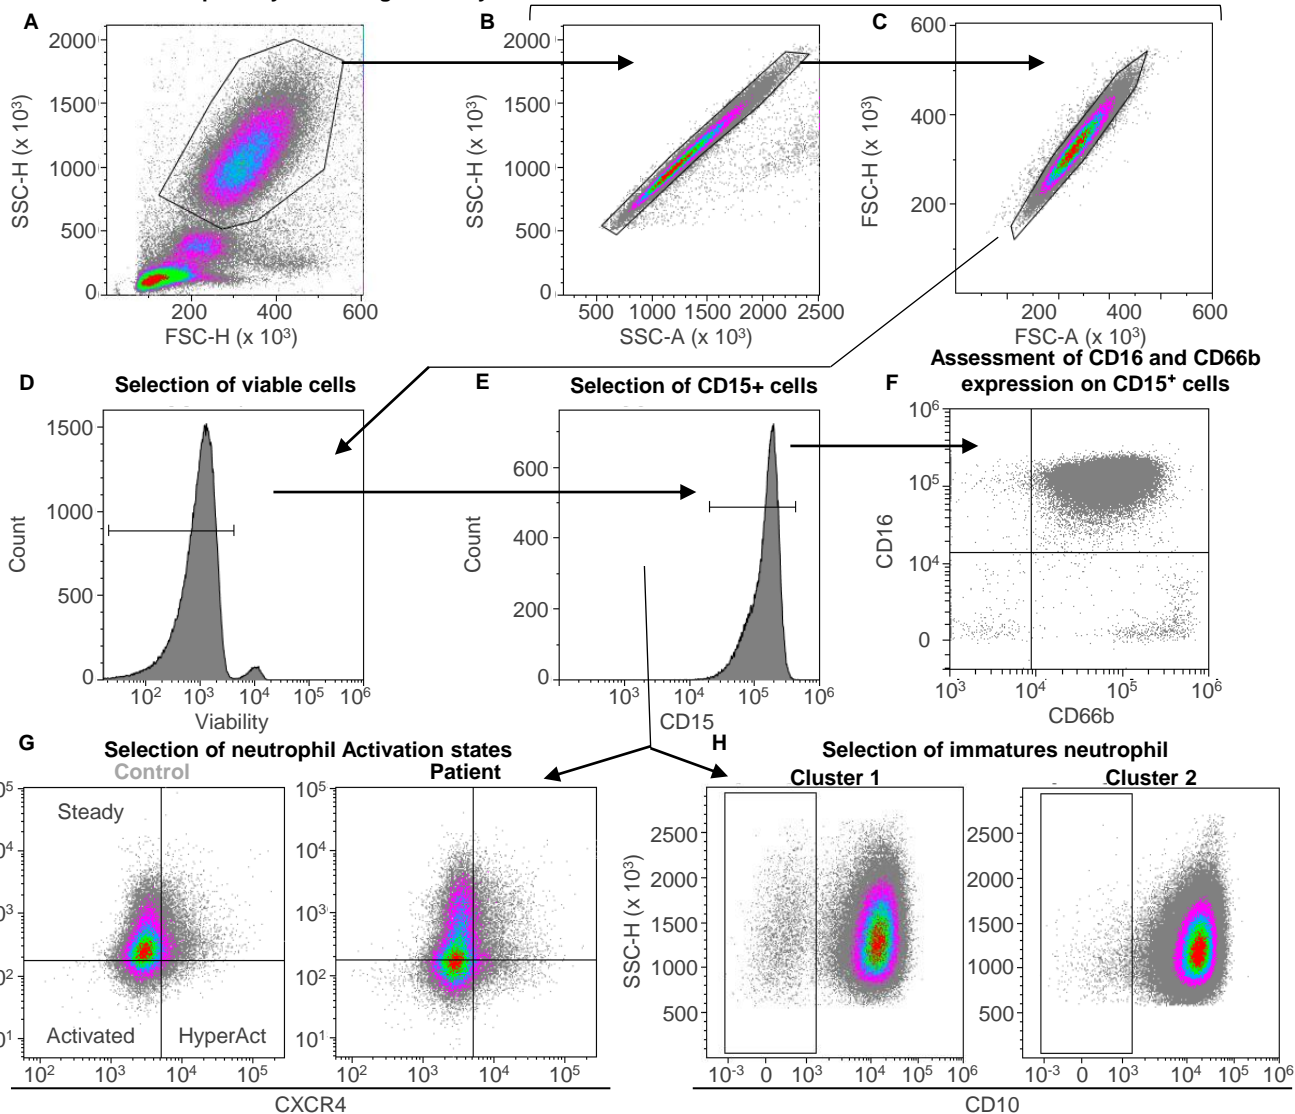

**Supporting Figure 1: Gating strategy for flow cytometry analysis of neutrophils (A)** Initial identification of the neutrophil population based on forward scatter (FSC) and side scatter (SSC) properties. **(B–C)** Doublet exclusion within the neutrophil gate using SSC-H/SSC-A followed by FSC-H/FSC-A parameters. **(D)** Selection of viable cells. **(E)** Selection of CD15<sup>+</sup> cells. **(F)** Assessment of CD16 and CD66b expression on CD15<sup>+</sup> cells. **(G)** Identification of neutrophil activation states: steady (CXCR4<sup>+</sup>CD62L<sup>+</sup>), activated (CXCR4<sup>+</sup>CD62L<sup>low</sup>), and hyperactivated (CXCR4<sup>high</sup>CD62L<sup>low</sup>). **(H)** Detection of immature neutrophils based on CD10<sup>-</sup> expression.

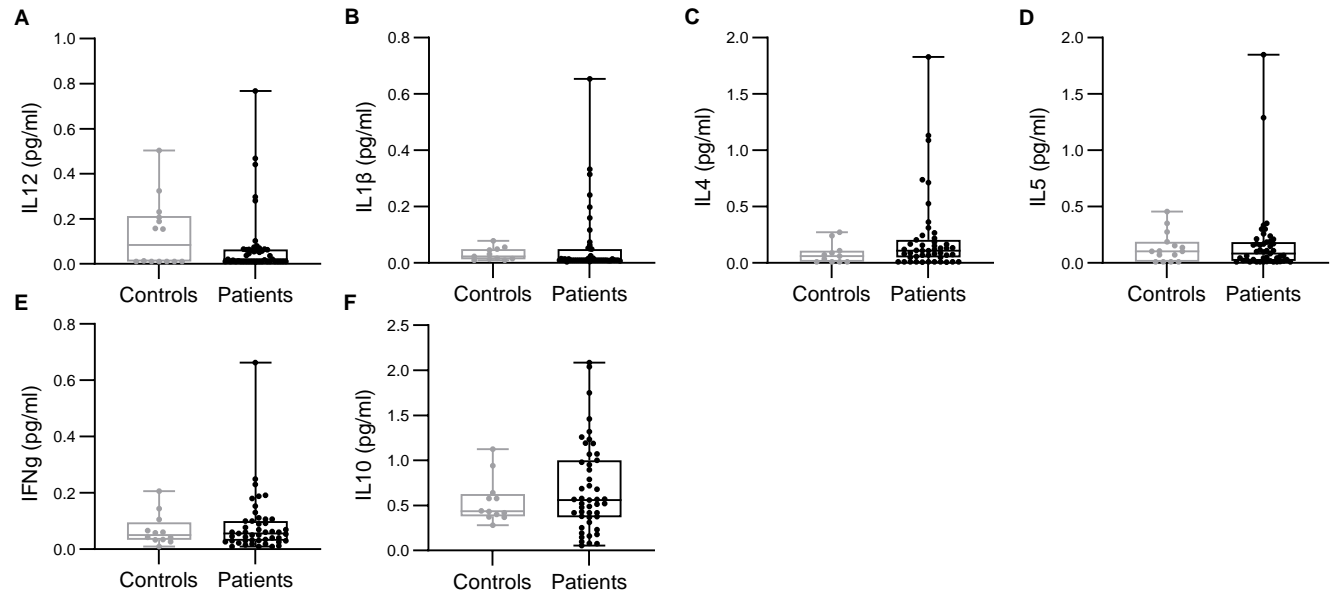

**Supporting Figure 2 : Cytokines concentration in sera of patients with epilepsy**

(A-F) Graphics displaying cytokines concentrations in sera of control (grey) and epileptic patients (black) and expressed in pg/ml. Data are shown as box-and-whisker plots with individual values overlaid; boxes represent the interquartile range, the horizontal line indicates the median, and whiskers extend to the minimum and maximum values.

Data are shown as box-and-whisker plots with individual values overlaid; boxes represent the interquartile range, the horizontal line indicates the median, and whiskers extend to the minimum and maximum values. Normality was assessed using the Shapiro-Wilk test; subsequently, Student's t-test or Mann-Whitney test was conducted. \*P<0.05, \*\*P<0.01, \*\*\*P<0.001.
